# Supplementary material for: Trends in Treatment of Head and Neck Cancer in Germany: A Diagnosis-Related-Groups-Based Nationwide Analysis, 2005–2018
Source: MDPI journal article supplement (doi:10.3390/cancers13236060), 2021-12-01
Supplement: s1 [file s1]

# Supplementary Materials: Trends in Treatment of Head and Neck Cancer in Germany: A Diagnosis-Related-Groups-Based Nationwide Analysis, 2005–2018

Isabel Hermanns Rafat Ziadat, Peter Schlattmann and Orlando Guntinas-Lichius

**Table S1.** Change of operation and procedure rates for oral cavity cancer in Germany over the time from 2005 to 2018.

| OPS-Code | Estimate | StdErr | ChiSq | p       | RR   | (95% CI)      |
|----------|----------|--------|-------|---------|------|---------------|
| 8-52     | 0.0175   | 0.0039 | 19.71 | <0.0001 | 1.09 | (1.05–1.13)   |
| 8-54     | 0.0188   | 0.0049 | 14.92 | 0.0001  | 1.10 | (1.05–1.15)   |
| 5-270    | 0.0081   | 0.0069 | 1.39  | 0.2383  | 1.04 | (0.97–1.11)   |
| 5-271    | 0.0262   | 0.0193 | 1.84  | 0.1752  | 1.14 | (0.94–1.38)   |
| 5-272    | 0.0131   | 0.0042 | 9.82  | 0.0017  | 1.07 | (1.02–1.11)   |
| 5-273    | -0.0077  | 0.0038 | 4.23  | 0.0397  | 0.96 | (0.93 – 1.00) |
| 5-274    | -0.0206  | 0.0070 | 8.69  | 0.0032  | 0.90 | (0.84–0.97)   |
| 5-275    | -0.0084  | 0.0072 | 1.35  | 0.2449  | 0.96 | (0.89–1.03)   |
| 5-277    | 0.0113   | 0.0071 | 2.52  | 0.1126  | 1.06 | (0.99–1.13)   |
| 5-278    | 0.0412   | 0.0057 | 51.75 | <0.0001 | 1.23 | (1.16–1.30)   |
| 5-401    | 0.0005   | 0.0051 | 0.01  | 0.9255  | 1.00 | (0.95–1.05)   |
| 5-403    | 0.0172   | 0.0028 | 38.29 | <0.0001 | 1.09 | (1.06–1.12)   |

OPS = Operation and Procedure Classification System; StdErr = standard error; ChiSq = chi-square distribution; CI = confidence interval; 8-52 = radiotherapy; 8-54 = chemotherapy/immunotherapy; 5-270 = maxillofacial incision and drainage; 5-271 = incision of hard and soft palate; 5-272 = excision and destruction of diseased hard and soft palate; 5-273 = incision, excision and destruction in the oral cavity; 5-274 = floor of the mouth reconstruction; 5-275 = palatoplasty; 5-277 = resection of the floor of the mouth and reconstruction; 5-278 = resection of the cheek and reconstruction; 5-401 = excision of neck lymph nodes and lymph vessels; 5-403 = radical neck dissection

**Table S2.** Change of operation and procedure rates for oropharyngeal cancer in Germany over the time from 2005 to 2018.

| OPS-Code | Estimate | StdErr | ChiSq | p       | RR   | (95% CI)    |
|----------|----------|--------|-------|---------|------|-------------|
| 8-52     | 0.0156   | 0.0057 | 7.43  | 0.0064  | 1.08 | (1.02–1.14) |
| 8-54     | 0.0147   | 0.0058 | 6.42  | 0.0113  | 1.08 | (1.02–1.14) |
| 5-290    | -0.0482  | 0.0087 | 30.87 | <0.0001 | 0.79 | (0.72–0.86) |
| 5-292    | -0.0571  | 0.0124 | 21.27 | <0.0001 | 0.75 | (0.67–0.85) |
| 5-293    | -0.0799  | 0.0121 | 43.51 | <0.0001 | 0.67 | (0.60–0.76) |
| 5-294    | 0.0157   | 0.0105 | 2.22  | 0.1361  | 1.08 | (0.98–1.20) |
| 5-295    | 0.0150   | 0.0044 | 11.55 | 0.0007  | 1.08 | (1.03–1.13) |
| 5-296    | 0.0569   | 0.0150 | 14.39 | 0.0001  | 1.33 | (1.15–1.54) |
| 5-401    | 0.0128   | 0.0068 | 3.52  | 0.0606  | 1.07 | (1.00–1.14) |
| 5-403    | -0.0036  | 0.0033 | 1.20  | 0.2736  | 0.98 | (0.95–1.01) |

OPS = Operation and Procedure Classification System; StdErr = standard error; ChiSq = chi-square distribution; CI = confidence interval; 8-52 = radiotherapy; 8-54 = chemotherapy/immunotherapy; 5-290 = pharyngotomy; 5-292 = excision and destruction of diseased pharyngeal tissue; 5-293 = pharyngoplasty; 5-294 = other reconstruction of the pharynx; 5-295 = partial resection of the pharynx; 5-296 = radical resection of the pharynx; 5-401 = excision of neck lymph nodes and lymph vessels; 5-403 = radical neck dissection

**Table S3.** Change of operation and procedure rates for hypopharyngeal cancer in Germany over the time from 2005 to 2018.

| OPS-Code | Estimate | StdErr | ChiSq  | p       | RR   | (95% CI)    |
|----------|----------|--------|--------|---------|------|-------------|
| 8-52     | -0.0133  | 0.0062 | 4.58   | 0.0323  | 0.94 | (0.88–0.99) |
| 8-54     | -0.0139  | 0.0053 | 6.84   | 0.0089  | 0.93 | (0.89–0.98) |
| 5-290    | -0.0903  | 0.0086 | 111.02 | <0.0001 | 0.64 | (0.59–0.69) |
| 5-292    | -0.0591  | 0.0088 | 45.16  | <0.0001 | 0.74 | (0.68–0.81) |
| 5-293    | -0.0973  | 0.0155 | 39.29  | <0.0001 | 0.61 | (0.53–0.72) |
| 5-294    | -0.0054  | 0.0076 | 0.49   | 0.4827  | 0.97 | (0.90–1.05) |
| 5-295    | -0.0244  | 0.0087 | 7.86   | 0.0051  | 0.89 | (0.81–0.96) |
| 5-296    | 0.0335   | 0.0120 | 7.86   | 0.0051  | 1.18 | (1.05–1.33) |
| 5-300    | -0.0584  | 0.0055 | 111.94 | <0.0001 | 0.75 | (0.71–0.79) |
| 5-301    | -0.0656  | 0.0115 | 32.30  | <0.0001 | 0.72 | (0.64–0.81) |
| 5-302    | -0.0621  | 0.0060 | 106.53 | <0.0001 | 0.73 | (0.69–0.78) |
| 5-303    | -0.0126  | 0.0047 | 7.15   | 0.0075  | 0.94 | (0.90–0.98) |
| 5-401    | -0.0280  | 0.0106 | 7.04   | 0.0080  | 0.87 | (0.78–0.96) |
| 5-403    | -0.0307  | 0.0044 | 48.07  | <0.0001 | 0.86 | (0.82–0.90) |

OPS = Operation and Procedure Classification System; StdErr = standard error; ChiSq = chi-square distribution; CI = confidence interval; 8-52 = radiotherapy; 8-54 = chemotherapy/immunotherapy; 5-290 = pharyngotomy; 5-292 = excision and destruction of diseased pharyngeal tissue; 5-293 = pharyngoplasty; 5-294 = other reconstruction of the pharynx; 5-295 = partial resection of the pharynx; 5-296 = radical resection of the pharynx; 5-300 = excision and destruction of diseased tissue of the larynx; 5-301 = hemilaryngectomy; 5-302 = other partial laryngectomy; 5-303 = laryngectomy; 5-401 = excision of neck lymph nodes and lymph vessels; 5-403 = radical neck dissection

**Table S4.** Change of operation and procedure rates for laryngeal cancer in Germany over the time from 2005 to 2018.

| OPS-Code | Estimate | StdErr | ChiSq  | p       | RR   | (95% CI)    |
|----------|----------|--------|--------|---------|------|-------------|
| 8-52     | 0.0063   | 0.0047 | 1.81   | 0.1779  | 1.03 | (0.99–1.08) |
| 8-54     | 0.0030   | 0.0039 | 0.62   | 0.4304  | 1.02 | (0.98–1.05) |
| 5-300    | -0.0244  | 0.0023 | 115.99 | <0.0001 | 0.89 | (0.87–0.91) |
| 5-301    | -0.0483  | 0.0060 | 64.83  | <0.0001 | 0.79 | (0.74–0.83) |
| 5-302    | -0.0095  | 0.0023 | 17.47  | <0.0001 | 0.95 | (0.93–0.98) |
| 5-303    | -0.0096  | 0.0021 | 19.99  | <0.0001 | 0.95 | (0.93–0.97) |
| 5-401    | -0.0352  | 0.0093 | 14.33  | 0.0002  | 0.84 | (0.77–0.92) |
| 5-403    | -0.0198  | 0.0018 | 125.34 | <0.0001 | 0.91 | (0.89–0.92) |

OPS = Operation and Procedure Classification System; StdErr = standard error; ChiSq = chi-square distribution; CI = confidence interval; 8-52 = radiotherapy; 8-54 = chemotherapy/immunotherapy; 5-300 = excision and destruction of diseased tissue of the larynx; 5-301 = hemilaryngectomy; 5-302 = other partial laryngectomy; 5-303 = laryngectomy; 5-401 = excision of neck lymph nodes and lymph vessels; 5-403 = radical neck dissection

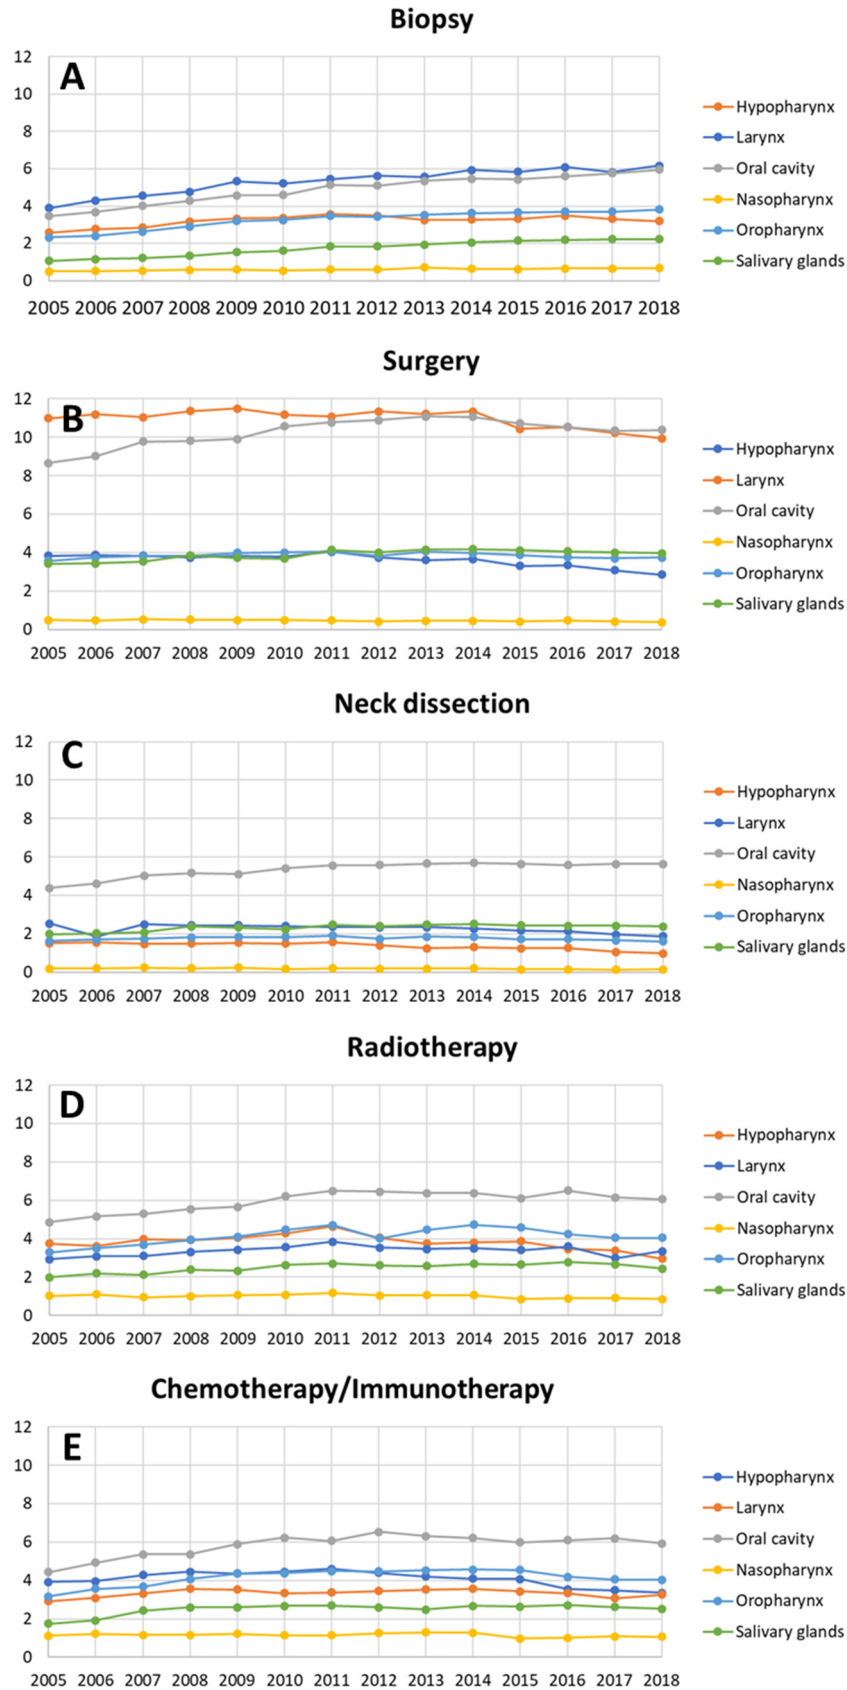

**Figure S1.** Annual treatment rates per 100,000 population for head and neck cancer from 2005 to 2018. A: biopsy rates; B: surgery of the primary tumor rates; C: neck dissection rates; D: radiotherapy rates, and E: chemotherapy/immunotherapy rates.
